# Supplementary material
Source: PubMed Central journal article supplement (PMC2268166)

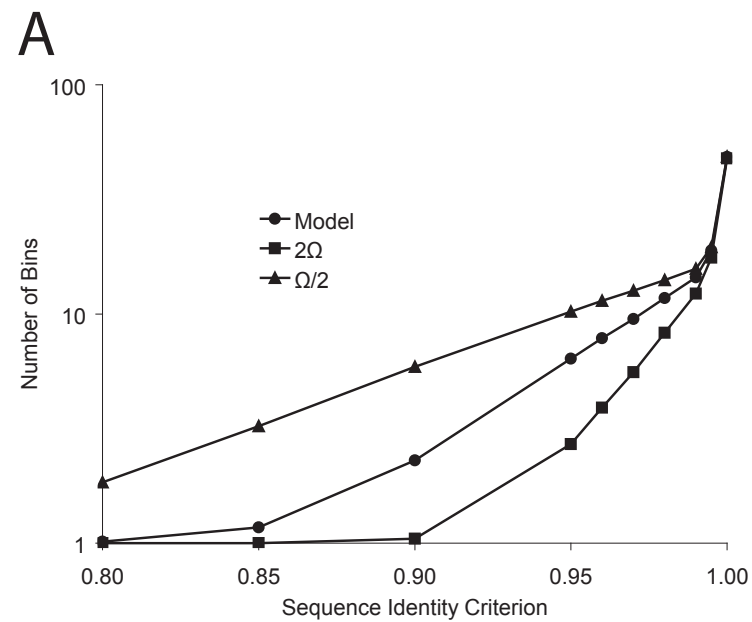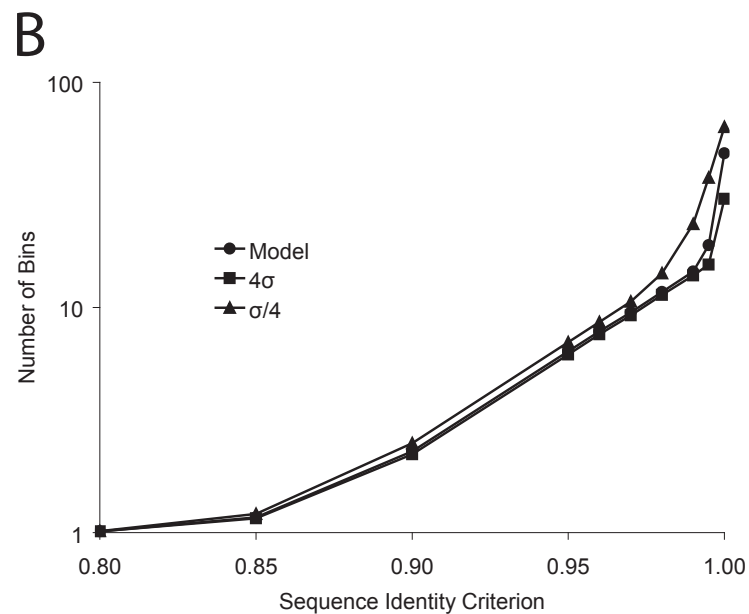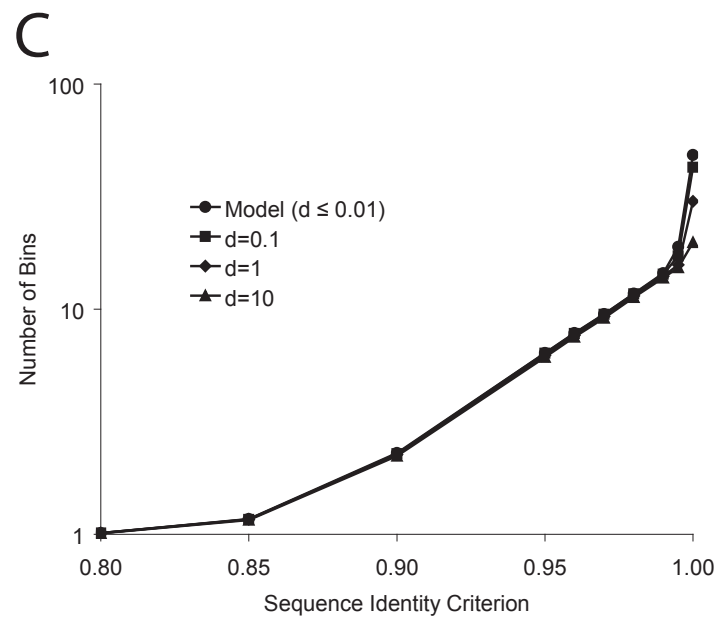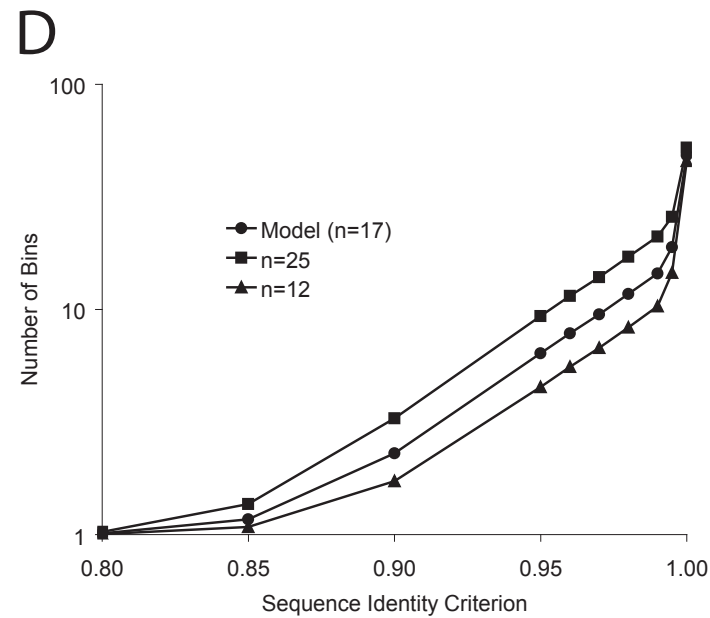

Supplement: supp_0712205105_12205Fig4.pdf [file supp_0712205105_12205Fig4.pdf]

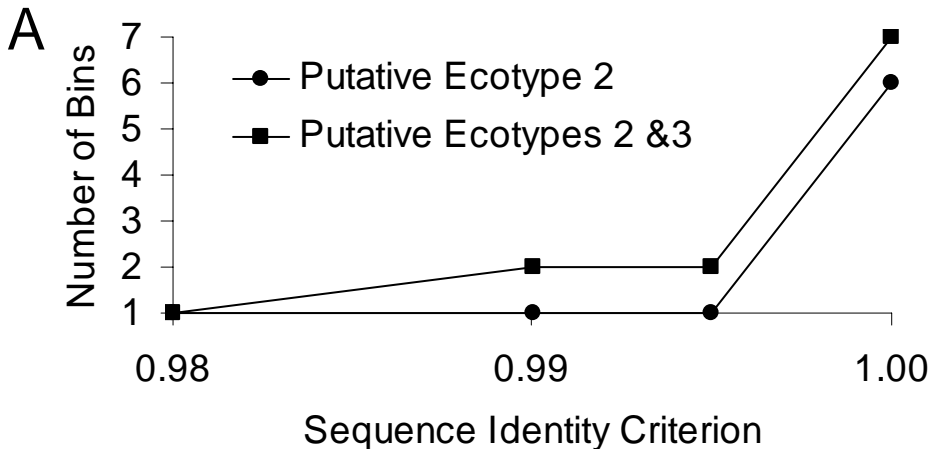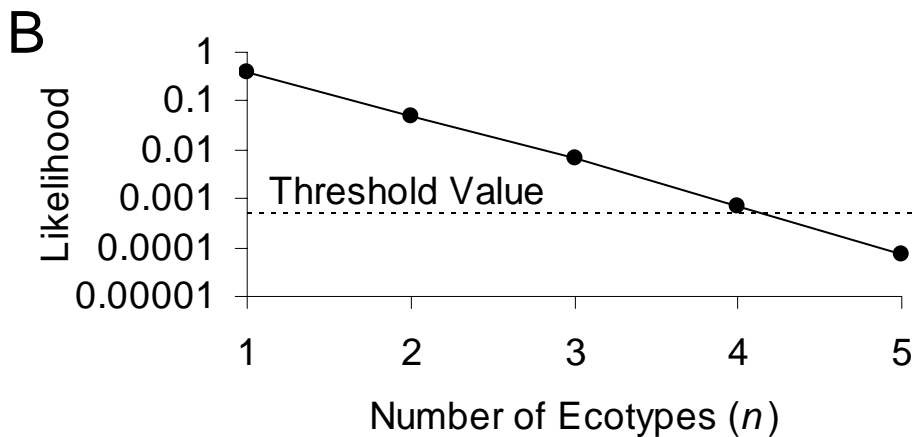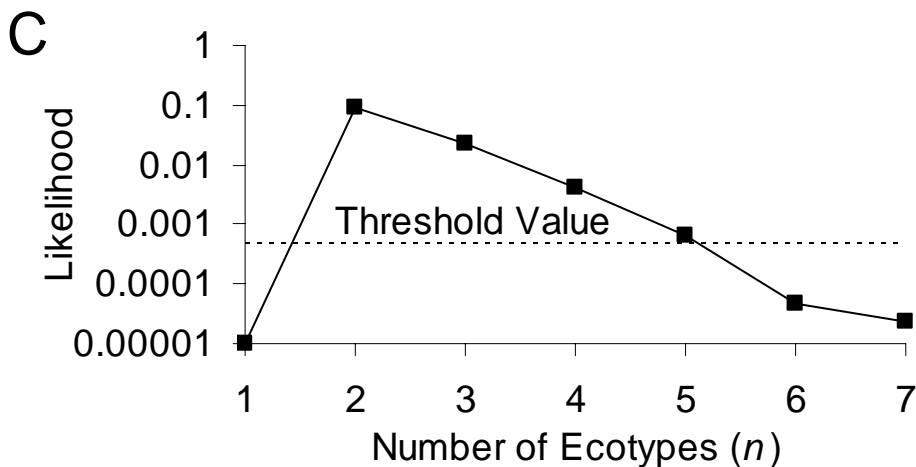

Supplement: supp_0712205105_12205Fig5.pdf [file supp_0712205105_12205Fig5.pdf]
